# Supplementary material for: Redundancy of myostatin and growth/differentiation factor 11 function
Source: Springer Nature journal article supplement (doi:10.1186/1471-213x-9-24), 2009-03-19
Supplement: Additional file 1 [file 1471-213x-9-24-s1.pdf]

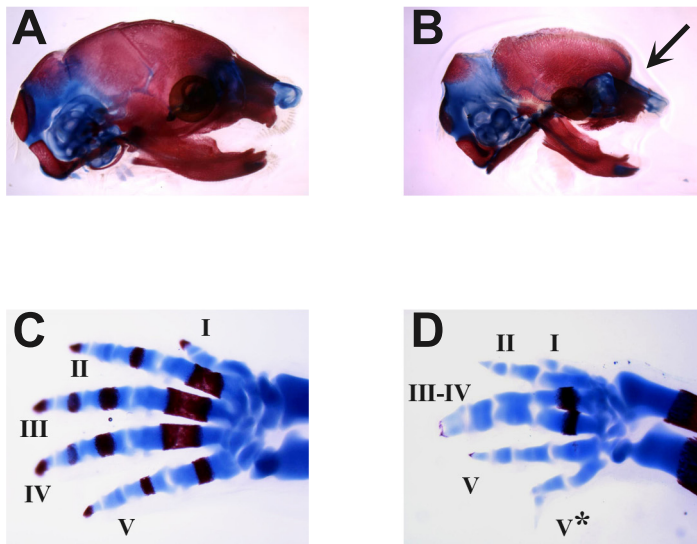

**Additional File 1. Cranial and forelimb digit skeletal defects in *Mstn*<sup>-/-</sup> *Gdf11*<sup>-/-</sup> newborn mice.**

(A and B) Skull phenotype of *Gdf11*<sup>-/-</sup> (A) and *Mstn*<sup>-/-</sup> *Gdf11*<sup>-/-</sup> (B) pups. Double mutants have a rounded frontal bone (arrow). Forelimb digit phenotype of *Gdf11*<sup>-/-</sup> (C) and *Mstn*<sup>-/-</sup> *Gdf11*<sup>-/-</sup> (D) pups. Digit identity is labeled with roman numerals. Note the fusion of digits III and IV and the supernumerary digit V (V\*) in the double mutant.
